# Supplementary material for: Myxinidin-Derived Peptide against Biofilms Caused by Cystic Fibrosis Emerging Pathogens
Source: MDPI journal article supplement (doi:10.3390/ijms24043092), 2023-02-04
Supplement: s1 [file s1]

## *Supporting information*

# **Myxinidin-Derived Peptide against Biofilms Caused by Cystic Fibrosis Emerging Pathogens**

**Rosa Bellavita <sup>1,†</sup>, Angela Maione <sup>2,†</sup>, Simone Braccia <sup>1</sup>, Marica Sinoca <sup>2</sup>, Stefania Galdiero <sup>1</sup>, Emilia Galdiero <sup>2</sup> and Annarita Falanga <sup>3,\*</sup>**

<sup>1</sup> Department of Pharmacy, School of Medicine, University of Naples 'Federico II',  
Via Domenico Montesano 49, 80131 Naples, Italy

<sup>2</sup> Department of Biology, University of Naples 'Federico II', Via Cinthia, 80126 Naples, Italy

<sup>3</sup> Department of Agricultural Sciences, University of Naples 'Federico II', Via dell' Università 100,  
80055 Portici, Italy

\* Correspondence: annarita.falanga@unina.it; Tel.: +39-081-253-4525

† These authors contributed equally to this work.

## **Table of contents**

1. HPLC chromatograms and analytical data of peptides **WMR-1, WMR-2, WMR-3, WMR-4, WMR-5** (Figures S1–S5)

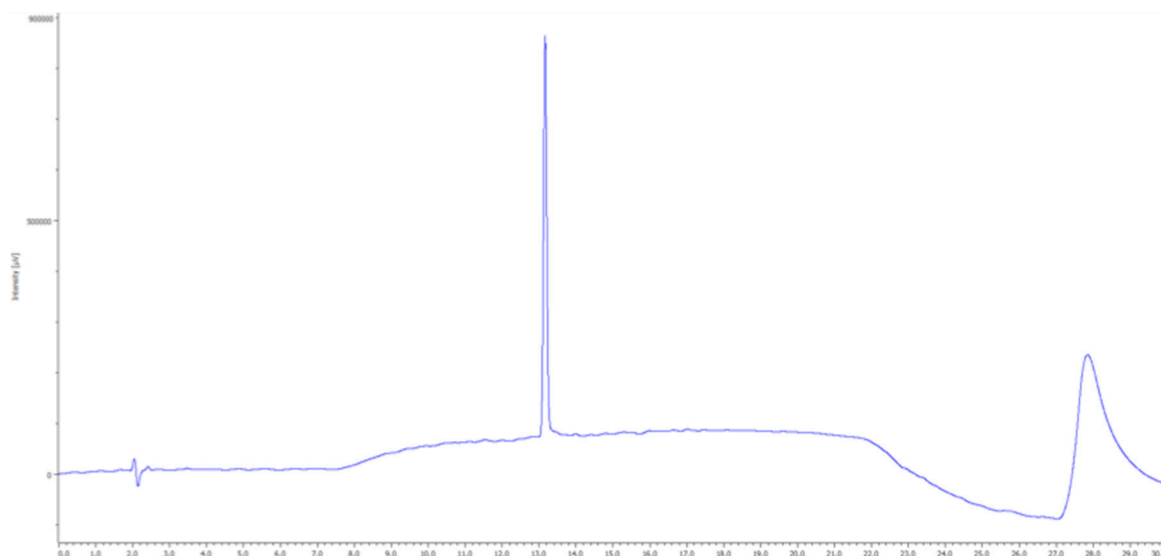

**Figure S1.** Chromatogram of peptide WMR-1 obtained by an analytical Jasco LC-NetII/ADC) equipped with a Phenomenex Kinetex C18 column (150 mm × 4.6 mm, 5 μm, 100 Å), and monitored by UV detection at 220 nm. [linear gradient 5–70% MeCN (0.1% TFA) in H<sub>2</sub>O (0.1% TFA) over 20 min, flow rate of 1 mL/min]. Calculated mass: 1759.08. Found mass:  $[M+2H]^+/2 = 880.61$ .

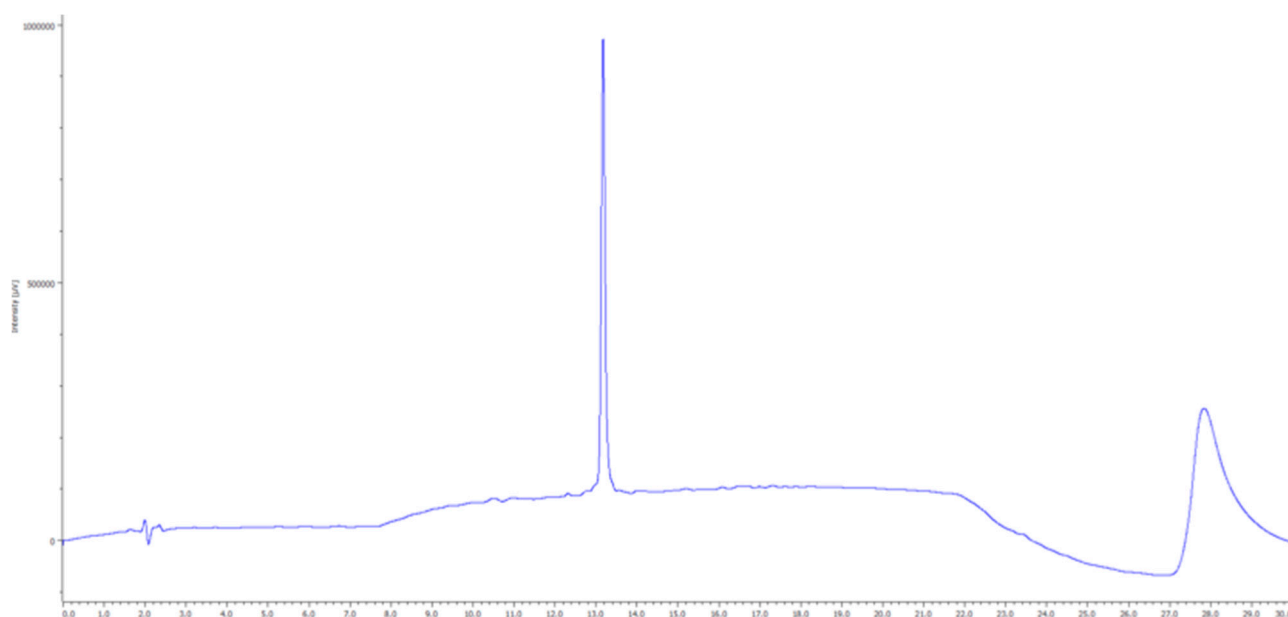

**Figure S2.** Chromatogram of peptide WMR-2 obtained by an analytical Jasco LC-NetII/ADC) equipped with a Phenomenex Kinetex C18 column (150 mm × 4.6 mm, 5 μm, 100 Å), and monitored by UV detection at 220 nm. [linear gradient 5–70% MeCN (0.1% TFA) in H<sub>2</sub>O (0.1% TFA) over 20 min, flow rate of 1 mL/min]. Calculated mass: 1759.08. Found mass:  $[M+2H]^+/2 = 880.61$ .

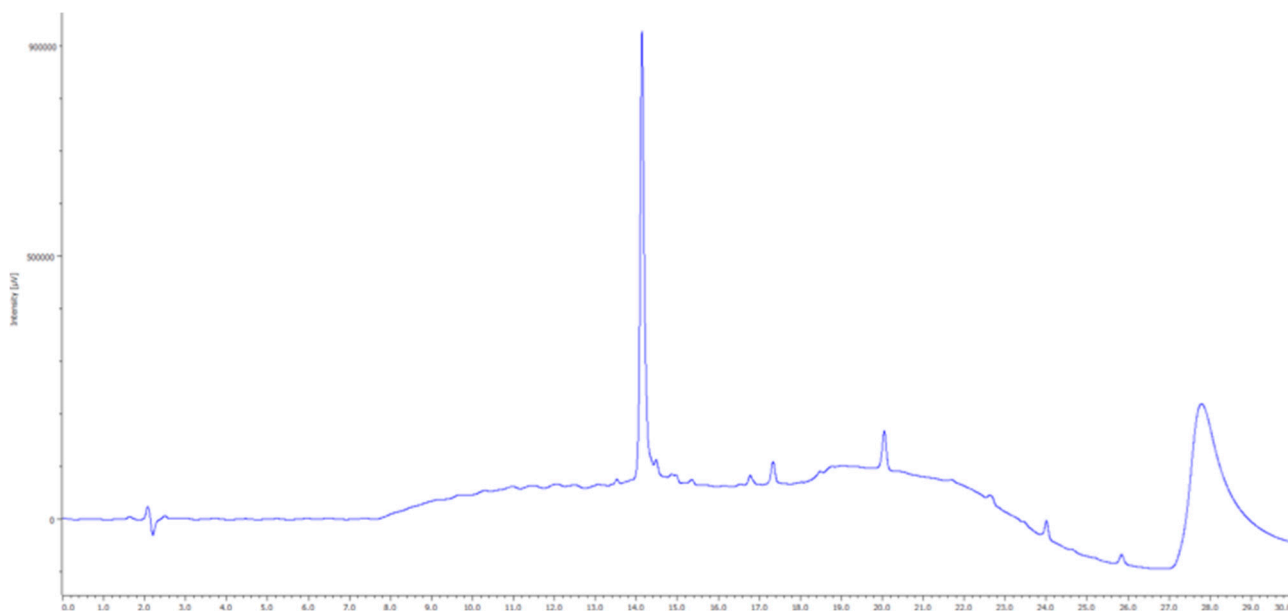

**Figure S3.** Chromatogram of peptide WMR-3 obtained by an analytical Jasco LC-NetII/ADC) equipped with a Phenomenex Kinetex C18 column (150 mm × 4.6 mm, 5 μm, 100 Å), and monitored by UV detection at 220 nm. [linear gradient 5–70% MeCN (0.1% TFA) in H<sub>2</sub>O (0.1% TFA) over 20 min, flow rate of 1 mL/min]. Calculated mass: 1788.19. Found mass:  $[M+2H]^+/2 = 895.95$ .

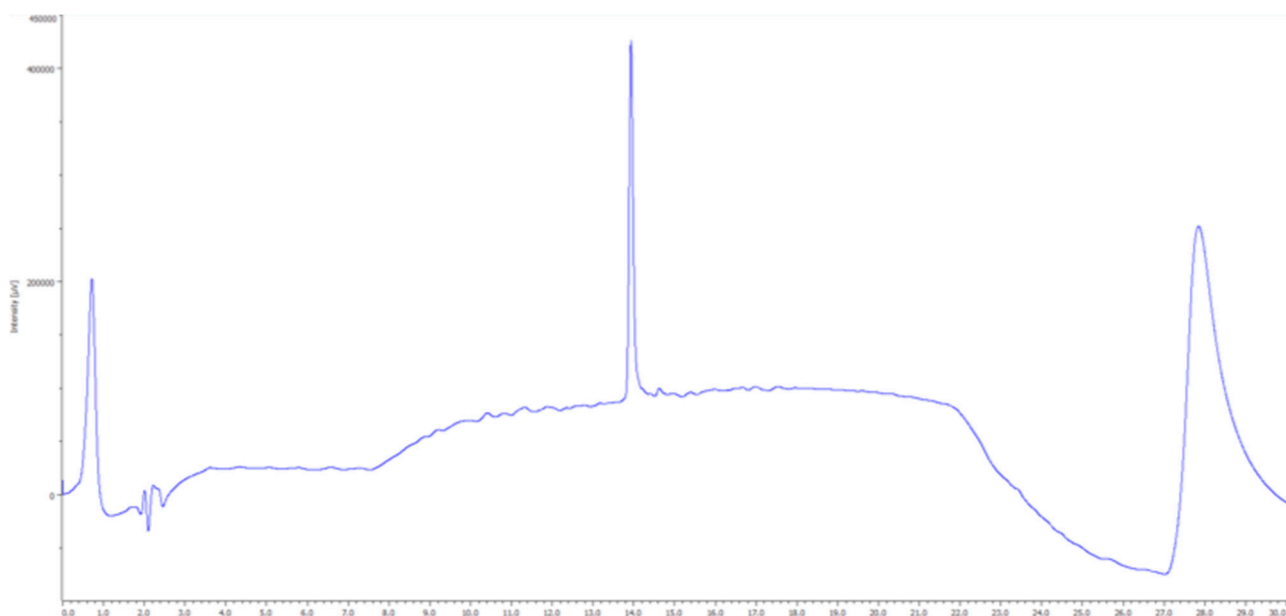

**Figure S4.** Chromatogram of peptide WMR-4 obtained by an analytical Jasco LC-NetII/ADC) equipped with a Phenomenex Kinetex C18 column (150 mm × 4.6 mm, 5 μm, 100 Å), and monitored by UV detection at 220 nm. [linear gradient 5–70% MeCN (0.1% TFA) in H<sub>2</sub>O (0.1% TFA) over 20 min, flow rate of 1 mL/min]. Calculated mass: 1788.19. Found mass:  $[M+2H]^+/2 = 895.95$ .

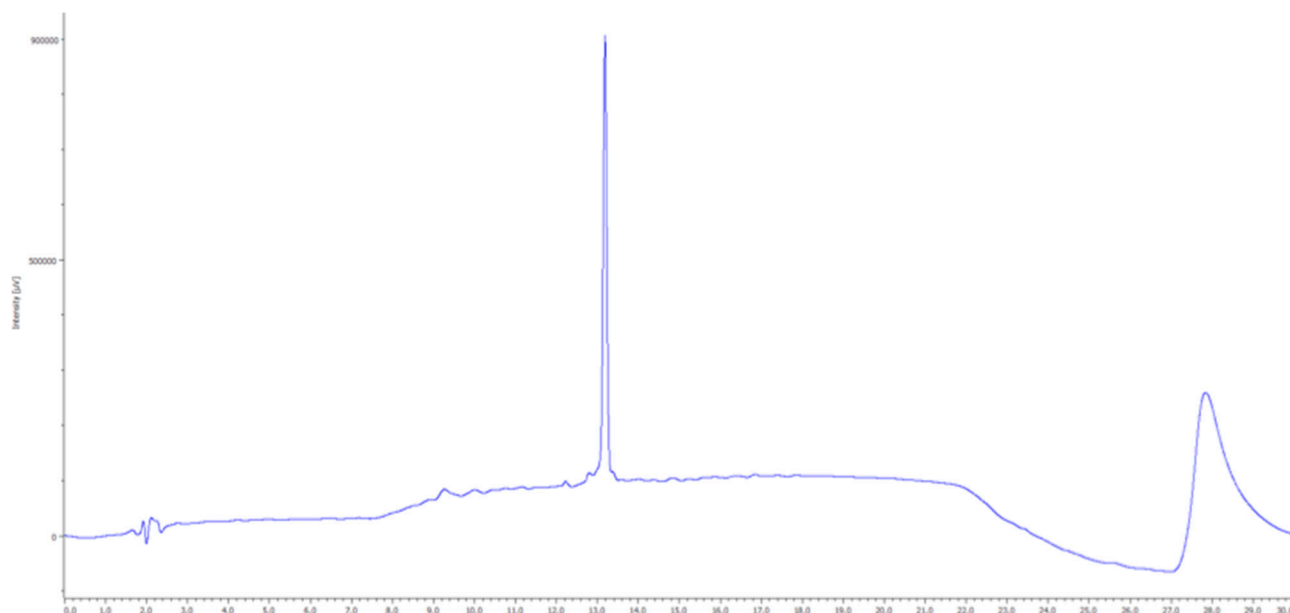

**Figure S5.** Chromatogram of peptide WMR-5 obtained by an analytical Jasco LC-NetII/ADC) equipped with a Phenomenex Kinetex C18 column (150 mm × 4.6 mm, 5 μm, 100 Å), and monitored by UV detection at 220 nm. [linear gradient 5–70% MeCN (0.1% TFA) in H<sub>2</sub>O (0.1% TFA) over 20 min, flow rate of 1 mL/min]. Calculated mass: 1717.04 Found mass:  $[M+2H]^+/2 = 859.96$ .
